# Supplementary material
Source: PubMed Central journal article supplement (PMC6146057)
Supplement: NIHMS969828-supplement-supplemental.pdf [file NIHMS969828-supplement-supplemental.pdf]

Supporting information for:

**A novel M<sub>1</sub> PAM VU0486846 exerts efficacy in cognition models without displaying agonist activity or cholinergic toxicity**

Jerri M. Rook,<sup>1,4†</sup> Jeanette L. Bertron,<sup>2†</sup> Hyekyung P. Cho,<sup>1,4†</sup> Pedro M. Garcia-Barrantes,<sup>4†</sup> Sean P. Moran,<sup>1,4</sup> James T. Maksymetz,<sup>1,4</sup> Kellie D. Nance,<sup>1,4</sup> Jonathan W. Dickerson,<sup>1,4</sup> Daniel H. Remke,<sup>1,4</sup> Sichen Chang,<sup>4</sup> Joel R. Harp,<sup>3</sup> Anna L. Blobaum,<sup>1,4</sup> Colleen M. Niswender,<sup>1,4,5</sup> Carrie K. Jones,<sup>1,4</sup> Shaun R. Stauffer,<sup>1</sup> P. Jeffrey Conn<sup>1,4,5</sup> and Craig W. Lindsley<sup>1,2,3,4\*</sup>

<sup>1</sup>Department of Pharmacology, <sup>2</sup>Department of Chemistry, <sup>3</sup>Department of Biochemistry, <sup>4</sup>Vanderbilt Center for Neuroscience Drug Discovery, <sup>5</sup>Vanderbilt Kennedy Center, Vanderbilt University, Nashville, TN 37232-6600, USA

Table of Contents:

|                                                                                         |         |
|-----------------------------------------------------------------------------------------|---------|
| Supporting Figure 1. Potency comparison of <b>6</b> and <b>16</b> at varying [ACh]..... | S2      |
| Supporting Figure 2. Mouse Irwin Battery.....                                           | S3-S4   |
| Supporting Figure 3. Raw Irwin Battery.....                                             | S5-S6   |
| Supporting X-ray data for <b>16</b> .....                                               | S7-S14  |
| Supporting Tables 1. Eurofins ancillary pharmacology data .....                         | S15-S17 |
| Supporting Methods.....                                                                 | S18     |

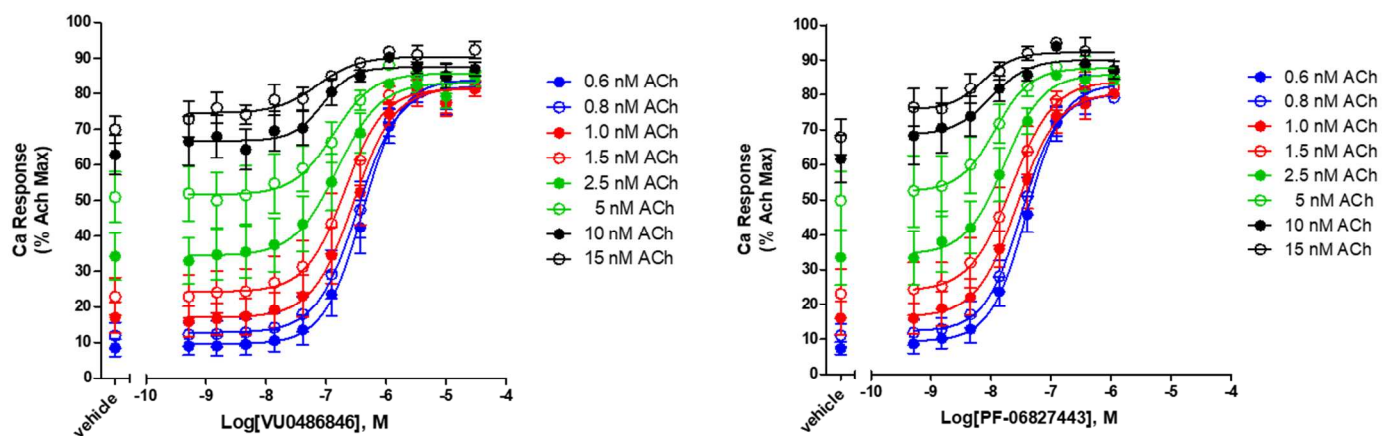

% ACh max

| Ach conc.   | 0.6 nM | 0.8 nM | 1.0 nM | 1.5 nM | 2.5 nM | 5 nM   | 10 nM  | 15 nM  |
|-------------|--------|--------|--------|--------|--------|--------|--------|--------|
| Vehicle     | 9 ± 2  | 12 ± 4 | 17 ± 4 | 23 ± 5 | 34 ± 7 | 51 ± 7 | 63 ± 6 | 70 ± 4 |
| VU0486846   | 84 ± 2 | 82 ± 2 | 82 ± 2 | 82 ± 2 | 83 ± 2 | 86 ± 1 | 88 ± 1 | 90 ± 1 |
| PF-06827443 | 83 ± 2 | 80 ± 2 | 81 ± 3 | 83 ± 2 | 85 ± 2 | 88 ± 2 | 90 ± 1 | 92 ± 1 |

PAM EC50 (nM)

| Ach conc.   | 0.6 nM    | 0.8 nM    | 1.0 nM    | 1.5 nM   | 2.5 nM   | 5 nM     | 10 nM   | 15 nM   |
|-------------|-----------|-----------|-----------|----------|----------|----------|---------|---------|
| VU0486846   | 430 ± 120 | 360 ± 118 | 308 ± 110 | 217 ± 72 | 161 ± 54 | 130 ± 22 | 83 ± 17 | 68 ± 11 |
| PF-06827443 | 40 ± 6    | 33 ± 6    | 30 ± 8    | 23 ± 6   | 16 ± 3   | 11 ± 1   | 9 ± 3   | 7 ± 1   |

PAM EC50 Fold Shift

| Ach conc.   | 0.6 nM | 0.8 nM | 1.0 nM | 1.5 nM | 2.5 nM | 5 nM | 10 nM | 15 nM |
|-------------|--------|--------|--------|--------|--------|------|-------|-------|
| VU0486846   | 1.0    | 1.2    | 1.4    | 2.0    | 2.7    | 3.3  | 5.1   | 6.3   |
| PF-06827443 | 1.0    | 1.2    | 1.4    | 1.8    | 2.5    | 3.6  | 4.6   | 5.7   |

**Supporting Figure 1.** M<sub>1</sub> PAM potency comparison of **6** and VU486 (**16**) at varying acetylcholine concentrations in hM<sub>1</sub>-CHO cells. With increasing ACh, M<sub>1</sub> PAM potency increases.

|                                                                           |                            | <b>VU0486846</b> |                |               |            |            |
|---------------------------------------------------------------------------|----------------------------|------------------|----------------|---------------|------------|------------|
|                                                                           |                            | <b>100 mg/kg</b> |                |               |            |            |
|                                                                           |                            | <b>15</b>        | <b>30</b>      | <b>60</b>     | <b>120</b> | <b>180</b> |
| <b>Time (min)</b>                                                         |                            |                  |                |               |            |            |
| <b>Autonomic Nervous System</b>                                           |                            |                  |                |               |            |            |
|                                                                           | <b>Ptosis</b>              | -                | -              | -             | -          | -          |
|                                                                           | <b>Exophthalmus</b>        | -                | -              | -             | -          | -          |
|                                                                           | <b>Miosis</b>              | -                | -              | -             | -          | -          |
|                                                                           | <b>Mydriasis</b>           | -                | -              | -             | -          | -          |
|                                                                           | <b>Corneal reflex loss</b> | -                | -              | -             | -          | -          |
|                                                                           | <b>Pinna reflex loss</b>   | -                | -              | +             | +          |            |
|                                                                           | <b>Piloerection</b>        | -                | ++             | ++            | ++         | ++         |
|                                                                           | <b>Respiratory rate</b>    | -                | -              | -             | -          | -          |
|                                                                           | <b>Writhing</b>            | -                | -              | -             | -          | -          |
|                                                                           | <b>Tail erection</b>       | -                | -              | -             | -          | -          |
|                                                                           | <b>Lacrimation</b>         | -                | -              | -             | -          | -          |
|                                                                           | <b>Defecation</b>          | -                | -              | -             | -          | -          |
|                                                                           | <b>Salivation</b>          | -                | -              | -             | -          | -          |
|                                                                           | <b>Vasodilatation</b>      | -                | -              | -             | -          | -          |
|                                                                           | <b>Skin color</b>          | -                | -              | -             | -          | -          |
|                                                                           | <b>Irritability</b>        | -                | -              | -             | -          | -          |
|                                                                           |                            | -                | -              | -             | -          | -          |
| <b>Somatomotor systems</b>                                                |                            |                  |                |               |            |            |
|                                                                           | <b>Motor activity</b>      | -                | -              | -             | -          | -          |
|                                                                           | <b>Convulsions</b>         | -                | -              | -             | -          | -          |
|                                                                           | <b>Arch/roll</b>           | -                | -              | -             | -          | -          |
|                                                                           | <b>Tremors</b>             | -                | -              | -             | -          | -          |
|                                                                           | <b>Leg weakness</b>        | -                | -              | -             | -          | -          |
|                                                                           | <b>Rigid stance</b>        | -                | -              | -             | -          | -          |
|                                                                           | <b>Spraddle</b>            | -                | -              | -             | -          | -          |
|                                                                           | <b>Placing loss</b>        | -                | -              | -             | -          | -          |
|                                                                           | <b>Grasping loss</b>       | -                | -              | -             | -          | -          |
|                                                                           | <b>Righting loss</b>       | -                | -              | -             | -          | -          |
|                                                                           | <b>Catalepsy</b>           | -                | -              | -             | -          | -          |
|                                                                           | <b>Tail pinch</b>          | -                | -              | -             | -          | -          |
|                                                                           | <b>Escape loss</b>         | -                | -              | -             | -          | -          |
| The mean scores of eight animals per treatment are classified as follows: |                            |                  |                |               |            |            |
|                                                                           | - no effect                | (+) 0.01 – 0.25  | + 0.251 – 0.50 | ++ 0.51 – 1.0 |            |            |

**Supporting Figure 2.** A Modified Irwin Toxicology Battery test in mice was used to assess any potential adverse effects of VU0486846 on the CNS. After administration of vehicle or 100 mg/kg VU0486846 (10% Tween 80, i.p., 10 ml/kg) animals were evaluated at 15, 30, 60 120 and 180 min for behavioral and

physiological changes from pretreatment baselines. An observer blinded to the treatment evaluated a series of autonomic nervous system and somatomotor system assessments and scored them on a scale from 0 (normal) to 3 (severe). The mean Modified Irwin Toxicology Battery test scores are classified as follows: - no effect, (+) 0.01 to 0.25, + 0.251 to 0.50, ++ 0.51 to 1.0. Pretreatment of VU0486846 (100 mg/kg, i.p.) did not cause significant observable adverse effects in normal, healthy mice.

|                                                                           |                            | <b>VU0486846</b>  |                |               |            |            |
|---------------------------------------------------------------------------|----------------------------|-------------------|----------------|---------------|------------|------------|
|                                                                           |                            | <b>56.6 mg/kg</b> |                |               |            |            |
|                                                                           |                            | <b>15</b>         | <b>30</b>      | <b>60</b>     | <b>120</b> | <b>180</b> |
| <b>Time (min)</b>                                                         |                            |                   |                |               |            |            |
| <b>Autonomic Nervous System</b>                                           |                            |                   |                |               |            |            |
|                                                                           | <b>Ptosis</b>              | -                 | -              | -             | -          | -          |
|                                                                           | <b>Exophthalmus</b>        | -                 | -              | -             | -          | -          |
|                                                                           | <b>Miosis</b>              | -                 | -              | -             | -          | -          |
|                                                                           | <b>Mydriasis</b>           | -                 | -              | -             | -          | -          |
|                                                                           | <b>Corneal reflex loss</b> | -                 | -              | -             | -          | -          |
|                                                                           | <b>Pinna reflex loss</b>   | -                 | -              | -             | -          | -          |
|                                                                           | <b>Piloerection</b>        | -                 | -              | -             | -          | -          |
|                                                                           | <b>Respiratory rate</b>    | -                 | -              | -             | -          | -          |
|                                                                           | <b>Writhing</b>            | -                 | -              | -             | -          | -          |
|                                                                           | <b>Tail erection</b>       | -                 | -              | -             | -          | -          |
|                                                                           | <b>Lacrimation</b>         | -                 | -              | -             | -          | -          |
|                                                                           | <b>Defecation</b>          | -                 | -              | -             | -          | -          |
|                                                                           | <b>Salivation</b>          | -                 | -              | -             | -          | -          |
|                                                                           | <b>Vasodilatation</b>      | -                 | -              | -             | -          | -          |
|                                                                           | <b>Skin color</b>          | -                 | -              | -             | -          | -          |
|                                                                           | <b>Irritability</b>        | -                 | -              | +             | -          | -          |
|                                                                           |                            | -                 | -              | -             | -          | -          |
| <b>Somatomotor systems</b>                                                |                            |                   |                |               |            |            |
|                                                                           | <b>Motor activity</b>      | -                 | -              | -             | -          | -          |
|                                                                           | <b>Convulsions</b>         | -                 | -              | -             | -          | -          |
|                                                                           | <b>Arch/roll</b>           | -                 | -              | -             | -          | -          |
|                                                                           | <b>Tremors</b>             | -                 | -              | -             | -          | -          |
|                                                                           | <b>Leg weakness</b>        | -                 | -              | -             | -          | -          |
|                                                                           | <b>Rigid stance</b>        | -                 | -              | -             | -          | -          |
|                                                                           | <b>Spraddle</b>            | -                 | -              | -             | -          | -          |
|                                                                           | <b>Placing loss</b>        | -                 | -              | -             | -          | -          |
|                                                                           | <b>Grasping loss</b>       | -                 | -              | -             | -          | -          |
|                                                                           | <b>Righting loss</b>       | -                 | -              | -             | -          | -          |
|                                                                           | <b>Catalepsy</b>           | -                 | -              | -             | -          | -          |
|                                                                           | <b>Tail pinch</b>          | -                 | -              | -             | -          | -          |
|                                                                           | <b>Escape loss</b>         | -                 | -              | -             | -          | -          |
| The mean scores of eight animals per treatment are classified as follows: |                            |                   |                |               |            |            |
|                                                                           | - no effect                | (+) 0.01 – 0.25   | + 0.251 – 0.50 | ++ 0.51 – 1.0 |            |            |

**Supporting Figure 2.** A Modified Irwin Toxicology Battery test in rats was performed to evaluate any potential adverse effects of VU0486846 on the CNS. After administration of vehicle or 56.6 mg/kg VU0486846 (10% Tween 80, i.p., 2 ml/kg), animals were evaluated at 15, 30, 60, 120 and 180 min for

behavioral and physiological changes from pretreatment baselines. An observer blinded to the treatment evaluated a series of autonomic nervous system and somatomotor system assessments and scored them on a scale from 0 (normal) to 3 (severe). The mean Modified Irwin Toxicology Battery test scores are classified as follows: - no effect, (+) 0.01 to 0.25, + 0.251 to 0.50, ++ 0.51 to 1.0. Pretreatment of VU0486846 (56.6 mg/kg, i.p.) did not cause significant observable adverse effects in normal, healthy rats.

CCDC deposition number: 1590579

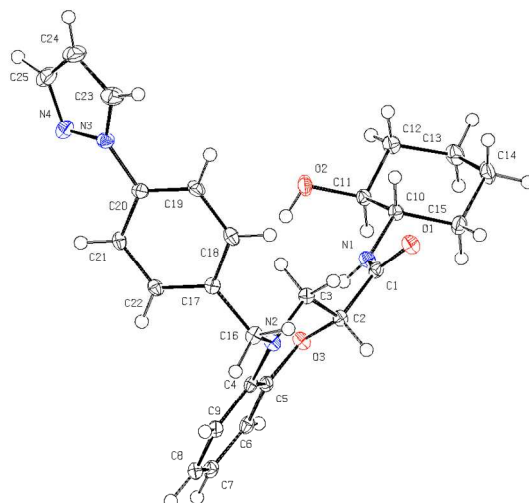

**Table 1 Crystal data and structure refinement for Garcia01.**

|                                               |                                                               |
|-----------------------------------------------|---------------------------------------------------------------|
| Identification code                           | Garcia01                                                      |
| Empirical formula                             | $C_{25}H_{28}N_4O_3$                                          |
| Formula weight                                | 432.51                                                        |
| Temperature/K                                 | 100                                                           |
| Crystal system                                | orthorhombic                                                  |
| Space group                                   | $P2_12_12_1$                                                  |
| $a/\text{\AA}$                                | 5.74144(5)                                                    |
| $b/\text{\AA}$                                | 12.67188(16)                                                  |
| $c/\text{\AA}$                                | 29.0999(3)                                                    |
| $\alpha/^\circ$                               | 90                                                            |
| $\beta/^\circ$                                | 90                                                            |
| $\gamma/^\circ$                               | 90                                                            |
| Volume/ $\text{\AA}^3$                        | 2117.15(4)                                                    |
| Z                                             | 4                                                             |
| $\rho_{\text{calc}}/\text{cm}^3$              | 1.357                                                         |
| $\mu/\text{mm}^{-1}$                          | 0.731                                                         |
| F(000)                                        | 920.0                                                         |
| Crystal size/ $\text{mm}^3$                   | $0.431 \times 0.196 \times 0.045$                             |
| Radiation                                     | Cu K $\alpha$ ( $\lambda = 1.54184$ )                         |
| $2\theta$ range for data collection/ $^\circ$ | 7.61 to 147.582                                               |
| Index ranges                                  | $-7 \leq h \leq 6, -15 \leq k \leq 15, -34 \leq l \leq 36$    |
| Reflections collected                         | 21610                                                         |
| Independent reflections                       | 4262 [ $R_{\text{int}} = 0.0357, R_{\text{sigma}} = 0.0266$ ] |
| Data/restraints/parameters                    | 4262/0/290                                                    |
| Goodness-of-fit on $F^2$                      | 1.029                                                         |
| Final R indexes [ $I \geq 2\sigma(I)$ ]       | $R_1 = 0.0318, wR_2 = 0.0801$                                 |
| Final R indexes [all data]                    | $R_1 = 0.0338, wR_2 = 0.0817$                                 |
| Largest diff. peak/hole / $e \text{\AA}^{-3}$ | 0.15/-0.18                                                    |
| Flack parameter                               | -0.12(7)                                                      |

**Table 2 Fractional Atomic Coordinates ( $\times 10^4$ ) and Equivalent Isotropic Displacement Parameters ( $\text{\AA}^2 \times 10^3$ ) for Garcia01.  $U_{eq}$  is defined as 1/3 of the trace of the orthogonalised  $U_{IJ}$  tensor.**

| Atom | x        | y          | z         | U(eq)   |
|------|----------|------------|-----------|---------|
| O1   | 3009(2)  | 3934.6(11) | 3601.3(5) | 18.3(3) |
| O2   | 10096(3) | 5726.5(12) | 3703.9(5) | 22.9(3) |
| O3   | 8007(2)  | 2471.3(11) | 3264.0(4) | 14.8(3) |
| N1   | 6848(3)  | 4055.4(13) | 3786.4(5) | 14.8(3) |
| N2   | 5254(3)  | 1961.1(13) | 2495.3(5) | 13.5(3) |
| N3   | 5473(3)  | 5306.2(13) | 849.8(6)  | 16.0(3) |
| N4   | 7668(3)  | 5701.2(14) | 794.6(6)  | 19.4(4) |
| C1   | 5036(3)  | 3618.3(15) | 3569.5(6) | 13.5(4) |
| C2   | 5560(3)  | 2673.6(15) | 3265.9(6) | 12.7(4) |
| C3   | 4719(3)  | 2869.5(15) | 2777.5(6) | 13.6(4) |
| C4   | 7247(3)  | 1385.2(15) | 2588.0(6) | 11.9(3) |
| C5   | 8605(3)  | 1633.2(15) | 2977.7(6) | 12.2(4) |
| C6   | 10568(3) | 1064.2(15) | 3093.1(6) | 14.1(4) |
| C7   | 11304(3) | 223.2(16)  | 2822.2(7) | 16.6(4) |
| C8   | 9990(3)  | -44.3(15)  | 2438.2(6) | 16.0(4) |
| C9   | 7988(3)  | 520.6(15)  | 2326.7(6) | 14.1(3) |
| C10  | 6605(3)  | 5014.3(15) | 4062.6(6) | 13.3(4) |
| C11  | 8986(3)  | 5527.8(15) | 4131.5(6) | 13.9(4) |
| C12  | 8682(3)  | 6567.3(16) | 4386.7(7) | 17.3(4) |
| C13  | 7503(4)  | 6400.3(18) | 4851.3(7) | 21.2(4) |
| C14  | 5171(4)  | 5835.1(18) | 4793.5(7) | 23.3(4) |
| C15  | 5479(4)  | 4801.7(16) | 4530.1(7) | 17.7(4) |
| C16  | 3895(3)  | 1847.2(15) | 2075.6(6) | 14.3(4) |
| C17  | 4332(3)  | 2720.1(15) | 1729.1(6) | 12.7(4) |
| C18  | 2622(3)  | 3480.0(16) | 1660.5(6) | 16.1(4) |
| C19  | 2977(3)  | 4323.9(16) | 1364.4(6) | 16.4(4) |
| C20  | 5081(3)  | 4404.9(15) | 1130.7(6) | 14.0(4) |
| C21  | 6793(3)  | 3637.6(16) | 1183.1(6) | 15.1(4) |
| C22  | 6416(3)  | 2801.2(15) | 1483.5(6) | 14.3(4) |
| C23  | 3826(4)  | 5945.1(18) | 659.7(7)  | 23.4(4) |
| C24  | 4988(5)  | 6789.8(18) | 471.6(7)  | 27.1(5) |
| C25  | 7344(4)  | 6602.4(18) | 566.8(7)  | 24.4(5) |



**Table 3 Anisotropic Displacement Parameters ( $\text{\AA}^2 \times 10^3$ ) for Garcia01. The Anisotropic displacement factor exponent takes the form:**

$$-2\pi^2[h^2a^2U_{11}+2hka*b*U_{12}+...].$$

| Atom | $U_{11}$ | $U_{22}$ | $U_{33}$ | $U_{23}$ | $U_{13}$ | $U_{12}$ |
|------|----------|----------|----------|----------|----------|----------|
| O1   | 15.9(7)  | 19.7(7)  | 19.5(6)  | -3.6(5)  | 0.0(6)   | 0.5(5)   |
| O2   | 24.8(8)  | 21.7(8)  | 22.4(7)  | -5.0(6)  | 12.5(6)  | -4.7(6)  |
| O3   | 11.6(6)  | 16.2(7)  | 16.5(6)  | -5.3(5)  | -2.5(5)  | -0.3(5)  |
| N1   | 14.6(7)  | 14.7(8)  | 15.0(7)  | -3.9(6)  | -0.4(6)  | -1.1(6)  |
| N2   | 12.8(7)  | 15.1(8)  | 12.7(7)  | -2.2(6)  | -2.3(6)  | 1.1(6)   |
| N3   | 18.3(8)  | 14.8(8)  | 14.9(7)  | 1.2(6)   | -1.5(6)  | 1.9(6)   |
| N4   | 22.4(8)  | 19.4(9)  | 16.6(7)  | 2.4(6)   | 0.7(6)   | -3.2(7)  |
| C1   | 15.8(9)  | 14.3(8)  | 10.4(7)  | 0.6(6)   | 0.2(7)   | -1.7(7)  |
| C2   | 9.9(8)   | 14.1(9)  | 14.3(9)  | -1.9(7)  | -0.2(6)  | -1.7(7)  |
| C3   | 13.1(8)  | 13.8(9)  | 13.8(8)  | -0.8(6)  | -1.0(7)  | -1.1(7)  |
| C4   | 9.5(8)   | 14.4(8)  | 11.7(8)  | 2.0(6)   | 0.6(6)   | -2.2(7)  |
| C5   | 11.4(8)  | 12.3(8)  | 12.8(8)  | -0.9(6)  | 1.5(6)   | -2.8(7)  |
| C6   | 10.3(8)  | 17.9(9)  | 14.0(8)  | 3.3(7)   | -0.2(6)  | -2.6(7)  |
| C7   | 12.1(8)  | 18(1)    | 19.6(9)  | 4.6(7)   | 2.5(7)   | 0.1(7)   |
| C8   | 16.0(8)  | 15.5(9)  | 16.6(9)  | -0.2(7)  | 4.2(7)   | 0.2(7)   |
| C9   | 14.1(8)  | 14.4(9)  | 13.7(8)  | -1.6(7)  | 0.7(7)   | -2.3(7)  |
| C10  | 13.6(8)  | 13.7(9)  | 12.5(8)  | -2.5(7)  | -0.2(7)  | -1.2(7)  |
| C11  | 12.0(8)  | 14.1(9)  | 15.5(8)  | -2.0(7)  | 1.7(7)   | -1.4(7)  |
| C12  | 17.0(9)  | 16.7(10) | 18.0(9)  | -4.8(7)  | -0.2(7)  | -2.9(7)  |
| C13  | 25.7(10) | 22.4(10) | 15.5(9)  | -7.6(7)  | -0.1(8)  | -0.9(8)  |
| C14  | 24.9(10) | 26.3(11) | 18.8(9)  | -7.6(8)  | 7.8(8)   | -1.6(9)  |
| C15  | 18.7(9)  | 18.4(10) | 16.1(9)  | -1.5(7)  | 3.7(7)   | -4.6(8)  |
| C16  | 13.3(8)  | 17.4(9)  | 12.3(8)  | 0.0(7)   | -3.1(7)  | -3.1(7)  |
| C17  | 12.5(8)  | 15.1(9)  | 10.4(8)  | -1.3(7)  | -2.7(6)  | -1.4(7)  |
| C18  | 12.6(8)  | 19.2(10) | 16.6(9)  | -2.3(7)  | 0.3(7)   | 2.6(7)   |
| C19  | 15.1(8)  | 16.1(9)  | 17.8(8)  | -0.5(7)  | -0.3(7)  | 5.7(7)   |
| C20  | 17.7(9)  | 12.8(8)  | 11.4(8)  | -0.7(6)  | -2.0(7)  | 2.0(7)   |
| C21  | 11.1(8)  | 18.8(10) | 15.4(8)  | -0.8(7)  | 2.4(7)   | 1.0(7)   |
| C22  | 11.3(8)  | 16.2(9)  | 15.4(8)  | -0.2(7)  | -0.9(7)  | 2.9(7)   |
| C23  | 24.3(10) | 21.8(11) | 24.2(10) | 2.9(8)   | -6.2(9)  | 6.1(9)   |
| C24  | 42.4(13) | 18.7(10) | 20.2(10) | 5.0(8)   | -2.2(10) | 5.5(10)  |
| C25  | 37.3(12) | 19.5(10) | 16.4(9)  | 3.6(8)   | 0.4(8)   | -4.5(9)  |

**Table 4 Bond Lengths for Garcia01.**

| Atom | Atom | Length/Å | Atom | Atom | Length/Å |
|------|------|----------|------|------|----------|
| O1   | C1   | 1.235(2) | C6   | C7   | 1.391(3) |
| O2   | C11  | 1.420(2) | C7   | C8   | 1.391(3) |
| O3   | C2   | 1.428(2) | C8   | C9   | 1.392(3) |
| O3   | C5   | 1.393(2) | C10  | C11  | 1.527(2) |
| N1   | C1   | 1.337(2) | C10  | C15  | 1.530(2) |
| N1   | C10  | 1.463(2) | C11  | C12  | 1.522(3) |
| N2   | C3   | 1.447(2) | C12  | C13  | 1.527(3) |
| N2   | C4   | 1.384(2) | C13  | C14  | 1.528(3) |
| N2   | C16  | 1.456(2) | C14  | C15  | 1.528(3) |
| N3   | N4   | 1.365(2) | C16  | C17  | 1.518(2) |
| N3   | C20  | 1.423(2) | C17  | C18  | 1.390(3) |
| N3   | C23  | 1.362(3) | C17  | C22  | 1.397(3) |
| N4   | C25  | 1.333(3) | C18  | C19  | 1.388(3) |
| C1   | C2   | 1.518(2) | C19  | C20  | 1.390(3) |
| C2   | C3   | 1.521(2) | C20  | C21  | 1.391(3) |
| C4   | C5   | 1.412(2) | C21  | C22  | 1.391(3) |
| C4   | C9   | 1.400(3) | C23  | C24  | 1.375(3) |
| C5   | C6   | 1.379(3) | C24  | C25  | 1.401(4) |

**Table 5 Bond Angles for Garcia01.**

| Atom | Atom | Atom | Angle/°    | Atom | Atom | Atom | Angle/°    |
|------|------|------|------------|------|------|------|------------|
| C5   | O3   | C2   | 112.44(14) | C8   | C9   | C4   | 121.78(17) |
| C1   | N1   | C10  | 121.93(16) | N1   | C10  | C11  | 109.91(14) |
| C3   | N2   | C16  | 116.18(15) | N1   | C10  | C15  | 112.48(15) |
| C4   | N2   | C3   | 118.97(15) | C11  | C10  | C15  | 109.67(15) |
| C4   | N2   | C16  | 123.64(16) | O2   | C11  | C10  | 111.22(15) |
| N4   | N3   | C20  | 120.53(16) | O2   | C11  | C12  | 108.99(15) |
| C23  | N3   | N4   | 112.03(17) | C12  | C11  | C10  | 109.28(15) |
| C23  | N3   | C20  | 126.91(18) | C11  | C12  | C13  | 111.28(16) |
| C25  | N4   | N3   | 104.10(17) | C12  | C13  | C14  | 110.85(16) |
| O1   | C1   | N1   | 124.32(17) | C15  | C14  | C13  | 110.85(17) |
| O1   | C1   | C2   | 119.11(16) | C14  | C15  | C10  | 110.12(16) |
| N1   | C1   | C2   | 116.57(16) | N2   | C16  | C17  | 113.36(15) |
| O3   | C2   | C1   | 109.80(15) | C18  | C17  | C16  | 118.93(16) |
| O3   | C2   | C3   | 109.74(15) | C18  | C17  | C22  | 118.72(17) |
| C1   | C2   | C3   | 110.62(15) | C22  | C17  | C16  | 122.34(17) |
| N2   | C3   | C2   | 109.45(15) | C19  | C18  | C17  | 121.28(18) |
| N2   | C4   | C5   | 119.74(17) | C18  | C19  | C20  | 119.21(17) |
| N2   | C4   | C9   | 123.93(16) | C19  | C20  | N3   | 118.56(17) |
| C9   | C4   | C5   | 116.27(17) | C19  | C20  | C21  | 120.58(17) |
| O3   | C5   | C4   | 120.94(16) | C21  | C20  | N3   | 120.82(17) |
| C6   | C5   | O3   | 117.01(16) | C22  | C21  | C20  | 119.46(17) |
| C6   | C5   | C4   | 122.05(17) | C21  | C22  | C17  | 120.70(17) |
| C5   | C6   | C7   | 120.71(17) | N3   | C23  | C24  | 106.7(2)   |
| C8   | C7   | C6   | 118.48(18) | C23  | C24  | C25  | 104.95(19) |
| C7   | C8   | C9   | 120.67(18) | N4   | C25  | C24  | 112.2(2)   |

**Table 6 Hydrogen Atom Coordinates ( $\text{\AA}\times 10^4$ ) and Isotropic Displacement Parameters ( $\text{\AA}^2\times 10^3$ ) for Garcia01.**

| Atom | x     | y    | z    | U(eq) |
|------|-------|------|------|-------|
| H2   | 10932 | 5208 | 3633 | 34    |
| H1   | 8228  | 3758 | 3762 | 18    |
| H2A  | 4735  | 2042 | 3392 | 15    |
| H3A  | 3018  | 2996 | 2778 | 16    |
| H3B  | 5494  | 3503 | 2650 | 16    |
| H6   | 11426 | 1249 | 3360 | 17    |
| H7   | 12674 | -160 | 2898 | 20    |
| H8   | 10462 | -618 | 2250 | 19    |
| H9   | 7101  | 314  | 2066 | 17    |
| H10  | 5593  | 5520 | 3890 | 16    |
| H11  | 9989  | 5047 | 4319 | 17    |
| H12A | 7729  | 7054 | 4198 | 21    |
| H12B | 10226 | 6898 | 4434 | 21    |
| H13A | 7247  | 7092 | 5001 | 25    |
| H13B | 8532  | 5976 | 5052 | 25    |
| H14A | 4496  | 5686 | 5100 | 28    |
| H14B | 4076  | 6298 | 4625 | 28    |
| H15A | 3943  | 4462 | 4485 | 21    |
| H15B | 6472  | 4315 | 4710 | 21    |
| H16A | 2220  | 1840 | 2156 | 17    |
| H16B | 4274  | 1160 | 1932 | 17    |
| H18  | 1183  | 3421 | 1819 | 19    |
| H19  | 1796  | 4840 | 1322 | 20    |
| H21  | 8208  | 3684 | 1015 | 18    |
| H22  | 7588  | 2279 | 1522 | 17    |
| H23  | 2191  | 5830 | 658  | 28    |
| H24  | 4336  | 7373 | 312  | 33    |
| H25  | 8570  | 7064 | 479  | 29    |

#### Experimental

Single crystals of  $\text{C}_{25}\text{H}_{28}\text{N}_4\text{O}_3$  [Garcia01] were [?]. A suitable crystal was selected and [polyimide loop] on a SuperNova, Dual, Cu at zero, EosS2 diffractometer. The crystal was kept at 100 K during data collection. Using Olex2 [1], the structure was solved with the ShelXT [2] structure solution program using Intrinsic Phasing and refined with the ShelXL [3] refinement package using Least Squares minimisation.

1. Dolomanov, O.V., Bourhis, L.J., Gildea, R.J, Howard, J.A.K. & Puschmann, H. (2009), J. Appl. Cryst. 42, 339-341.
2. Sheldrick, G.M. (2015). Acta Cryst. A71, 3-8.
3. Sheldrick, G.M. (2015). Acta Cryst. C71, 3-8.

#### Crystal structure determination of [Garcia01]

**Crystal Data** for  $\text{C}_{25}\text{H}_{28}\text{N}_4\text{O}_3$  ( $M=432.51$  g/mol): orthorhombic, space group  $P2_12_12_1$  (no. 19),  $a = 5.74144(5)$   $\text{\AA}$ ,  $b = 12.67188(16)$   $\text{\AA}$ ,  $c = 29.0999(3)$   $\text{\AA}$ ,  $V = 2117.15(4)$   $\text{\AA}^3$ ,  $Z = 4$ ,  $T = 100$  K,  $\mu(\text{Cu K}\alpha) = 0.731$   $\text{mm}^{-1}$ ,  $D_{\text{calc}} = 1.357$   $\text{g/cm}^3$ , 21610 reflections measured ( $7.61^\circ \leq 2\theta \leq 147.582^\circ$ ), 4262 unique ( $R_{\text{int}} = 0.0357$ ,  $R_{\text{sigma}} = 0.0266$ ) which were used in all calculations. The final  $R_1$  was 0.0318 ( $I > 2\sigma(I)$ ) and  $wR_2$  was 0.0817 (all data).

## checkCIF (full publication check) running

---

Checking for embedded fcf data in CIF ...

Found embedded fcf data in CIF. Extracting fcf data from uploaded CIF, please wait ...

## checkCIF/PLATON (full publication check)

---

Structure factors have been supplied for datablock(s) I

THIS REPORT IS FOR GUIDANCE ONLY. IF USED AS PART OF A REVIEW PROCEDURE FOR PUBLICATION, IT SHOULD NOT REPLACE THE EXPERTISE OF AN EXPERIENCED CRYSTALLOGRAPHIC REFEREE.

No syntax errors found.

Please wait while processing ....

CIF dictionary

[Interpreting this report](#)

Structure factor report

### Datablock: I

---

Bond precision: C-C = 0.0028 Å Wavelength=1.54184  
Cell: a=5.74144(5) b=12.67188(16) c=29.0999(3)  
alpha=90 beta=90 gamma=90  
Temperature: 100 K

|                        | Calculated    | Reported      |
|------------------------|---------------|---------------|
| Volume                 | 2117.16(4)    | 2117.15(4)    |
| Space group            | P 21 21 21    | P 21 21 21    |
| Hall group             | P 2ac 2ab     | P 2ac 2ab     |
| Moiety formula         | C25 H28 N4 O3 | C25 H28 N4 O3 |
| Sum formula            | C25 H28 N4 O3 | C25 H28 N4 O3 |
| Mr                     | 432.51        | 432.51        |
| Dx, g cm <sup>-3</sup> | 1.357         | 1.357         |
| Z                      | 4             | 4             |
| Mu (mm <sup>-1</sup> ) | 0.731         | 0.731         |
| F000                   | 920.0         | 920.0         |
| F000'                  | 922.72        |               |
| h,k,lmax               | 7,15,36       | 7,15,36       |
| Nref                   | 4278[ 2495]   | 4262          |
| Tmin,Tmax              | 0.842,0.968   | 0.541,1.000   |
| Tmin'                  | 0.730         |               |

Correction method= # Reported T Limits: Tmin=0.541 Tmax=1.000  
AbsCorr = GAUSSIAN  
Data completeness= 1.71/1.00 Theta(max)= 73.791  
R(reflections)= 0.0318( 4090) WR2(reflections)= 0.0817( 4262)  
S = 1.029 Npar= 290

---

The following ALERTS were generated. Each ALERT has the format

**test-name\_ALERT\_alert-type\_alert-level.**

Click on the hyperlinks for more details of the test.

#### ● Alert level C

PLAT019\_ALERT\_1\_C\_diffn\_measured\_fraction\_theta\_full/\*\_max < 1.0 0.990 Report  
PLAT410\_ALERT\_2\_C Short Intra H...H Contact H9 .. H16B .. 1.98 Ang.  
PLAT934\_ALERT\_3\_C Number of (Iobs-Icalc)/SigmaW > 10 Outliers .... 1 Check

---

#### ● Alert level G

PLAT007\_ALERT\_5\_G Number of Unrefined Donor-H Atoms ..... 2 Report  
PLAT791\_ALERT\_4\_G The Model has Chirality at C2 (Chiral SPGR) R Verify

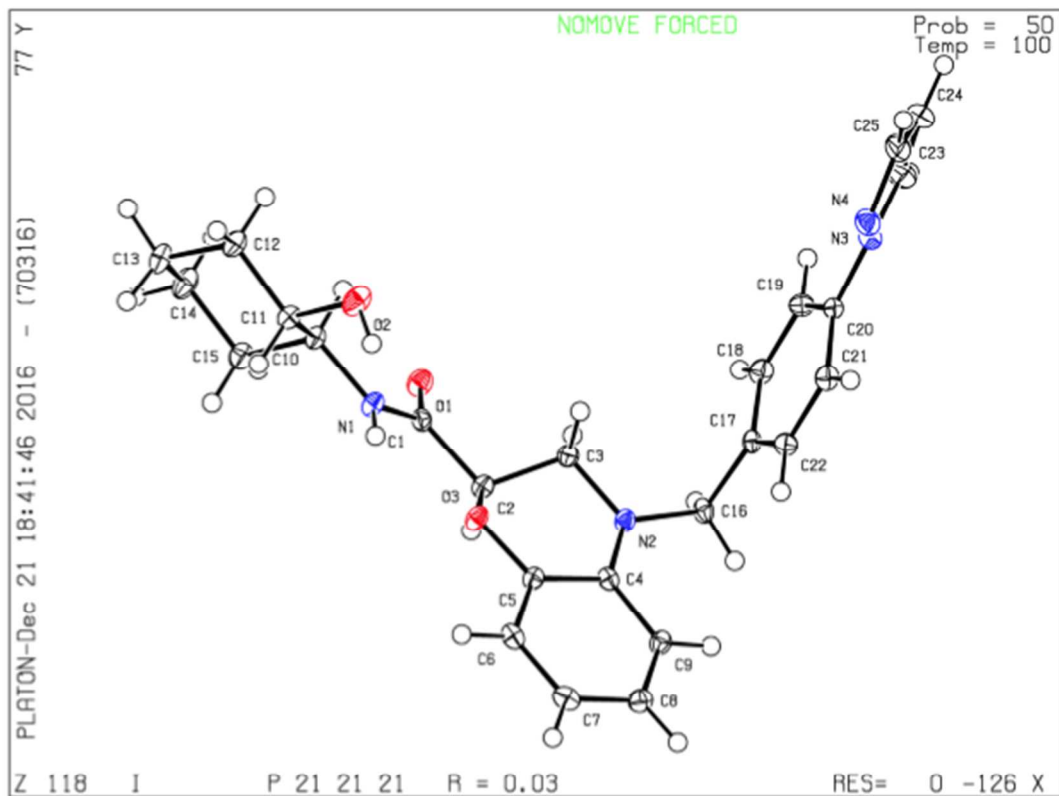

[Download CIF editor \(pubCIF\) from the IUCr](#)  
[Download CIF editor \(enCIFer\) from the CCDC](#)  
[Test a new CIF entry](#)

### **Eurofins Lead Profiling Data**

A radioligand binding panel of 68 targets (GPCRs, ion channels, transporters, and nuclear hormones) with data reported as % inhibition of radioligand binding at a 10  $\mu$ M concentration of **16** (VU0486846).

**Supporting Table 1:** Eurofins Profiling of **16** (VU0486846).

| <b>Target/Protein</b>                   | <b>Species</b> | <b>% Inhibition</b> |
|-----------------------------------------|----------------|---------------------|
| Adenosine A <sub>1</sub>                | Human          | 3                   |
| Adenosine A <sub>2A</sub>               | Human          | -2                  |
| Adenosine A <sub>3</sub>                | Human          | 7                   |
| Adrenergic $\alpha_{1A}$                | Rat            | 12                  |
| Adrenergic $\alpha_{1B}$                | Rat            | 5                   |
| Adrenergic $\alpha_{1D}$                | Human          | 2                   |
| Adrenergic $\alpha_{2A}$                | Human          | 21                  |
| Adrenergic $\beta_1$                    | Human          | -1                  |
| Adrenergic $\beta_2$                    | Human          | -1                  |
| Androgen (Testosterone)                 | Human          | 1                   |
| Bradykinin B <sub>1</sub>               | Human          | -9                  |
| Bradykinin B <sub>2</sub>               | Human          | 16                  |
| Calcium Channel L-Type, Benzothiazepine | Rat            | 7                   |
| Calcium Channel L-Type, Dihydropyridine | Rat            | 5                   |
| Calcium Channel N-Type                  | Rat            | -1                  |
| Cannabinoid CB <sub>1</sub>             | Human          | -1                  |
| Dopamine D <sub>1</sub>                 | Human          | -2                  |
| Dopamine D <sub>2S</sub>                | Human          | -9                  |
| Dopamine D <sub>3</sub>                 | Human          | 2                   |

|                                            |       |     |
|--------------------------------------------|-------|-----|
| Dopamine D <sub>4,2</sub>                  | Human | -2  |
| Endothelin ET <sub>A</sub>                 | Human | 0   |
| Endothelin ET <sub>B</sub>                 | Human | 2   |
| Epidermal Growth Factor (EGF)              | Human | -5  |
| Estrogen ER $\alpha$                       | Human | 2   |
| GABA <sub>A</sub> , Flunitrazepam, Central | Rat   | 4   |
| GABA <sub>A</sub> , Muscimol, Central      | Rat   | -4  |
| GABA <sub>B1A</sub>                        | Human | 2   |
| Glucocorticoid                             | Human | 0   |
| Glutamate, Kainate                         | Rat   | 2   |
| Glutamate, NMDA, Agonism                   | Rat   | -2  |
| Glutamate, NMDA, Glycine                   | Rat   | -5  |
| Glutamate, NMDA, Phencyclidine             | Rat   | -3  |
| Histamine H <sub>1</sub>                   | Human | 2   |
| Histamine H <sub>2</sub>                   | Human | -8  |
| Histamine H <sub>3</sub>                   | Human | 4   |
| Imidazoline I <sub>2</sub> , Central       | Rat   | 22  |
| Interleukin IL-1                           | Mouse | 16  |
| Leukotriene, Cysteinyl CysLT <sub>1</sub>  | Human | -2  |
| Melatonin MT <sub>1</sub>                  | Human | 2   |
| Muscarinic M <sub>1</sub>                  | Human | 12  |
| Muscarinic M <sub>2</sub>                  | Human | -2  |
| Muscarinic M <sub>3</sub>                  | Human | -14 |
| Neuropeptide Y Y <sub>1</sub>              | Human | -1  |
| Neuropeptide Y Y <sub>2</sub>              | Human | 2   |



|                                                   |         |     |
|---------------------------------------------------|---------|-----|
| Nicotinic Acetylcholine                           | Human   | -2  |
| Nicotinic Acetylcholine $\alpha_1$ , Bungarotoxin | Human   | -2  |
| Opiate $\delta_1$ (OP1, DOP)                      | Human   | -3  |
| Opiate $\kappa$ (OP2, KOP)                        | Human   | 5   |
| Opiate $\mu$ (OP3, MOP)                           | Human   | -9  |
| Phorbol Ester                                     | Mouse   | 5   |
| Platelet Activating Factor (PAF)                  | Human   | -4  |
| Potassium Channel [ $K_{ATP}$ ]                   | Hamster | 3   |
| Potassium Channel hERG                            | Human   | 10  |
| Prostanoid EP <sub>4</sub>                        | Human   | 2   |
| Purinergic P2X                                    | Rabbit  | 19  |
| Purinergic P2Y                                    | Rat     | -9  |
| Rolipram                                          | Rat     | 2   |
| Serotonin (5-HT <sub>1A</sub> )                   | Human   | -10 |
| Serotonin (5-HT <sub>2B</sub> )                   | Human   | -3  |
| Serotonin (5-HT <sub>3</sub> )                    | Human   | -11 |
| Sigma $\sigma_1$                                  | Human   | 2   |
| Sodium Channel, Site 2                            | Rat     | 19  |
| Tachykinin NK <sub>1</sub>                        | Human   | -1  |
| Thyroid Hormone                                   | Rat     | -3  |
| Transporter, Dopamine (DAT)                       | Human   | 4   |
| Transporter, GABA                                 | Rat     | 4   |
| Transporter, Norepinephrine (NET)                 | Human   | 0   |
| Transporter, Serotonin (SERT)                     | Human   | 0   |

**Supplemental field electrophysiology methods:** Recording pipettes were constructed from thin-walled borosilicate capillary glass tubing (I.D.=1.17 mm, O.D. 1.50 mm; Warner Instruments, Hamden, CT), pulled with a horizontal pipette puller (P-97 Sutter Instrument Co., Novata, CA) to a resistance of 1-3M $\Omega$  when filled with ACSF. Layer II/III was visualized using an Olympus BX50WI upright microscope (Olympus, Lake Success, NY) microscope according to landmarks illustrated in the Allen mouse brain atlas (Lein et al, 2007) and the recording electrode was laterally placed approximately 200 $\mu$ M away from layer 2/3 into layer V so that the recording and stimulating electrodes were parallel to each other. Input-output curves were generated to determine the stimulus intensity that produced approximately 70% of the maximum fEPSP slope before each experiment, which was then used as the baseline stimulation. Similarly, the recording electrode for ofEPSP was placed in layer V and an input-output curve was generated to produce approximately 70% of the maximal ofEPSP slope. Data were digitized using a Multiclamp 700B, using a sampling rate of 20,000kHz and were filtered at 0.5kHz, with a Digidata 1322A, pClamp 9.2 and Clampex 10.6.2 software (Molecular Devices) running on a Dell PC (Round Rock, TX). Offline data analysis to calculate fEPSP slope or ofEPSP slope was performed using Clampfit 10.2 (Molecular Devices).
